# Supplementary material
Source: PubMed Central journal article supplement (PMC7642062)
Supplement: NIHMS1619972-supplement-1.pdf [file NIHMS1619972-supplement-1.pdf]

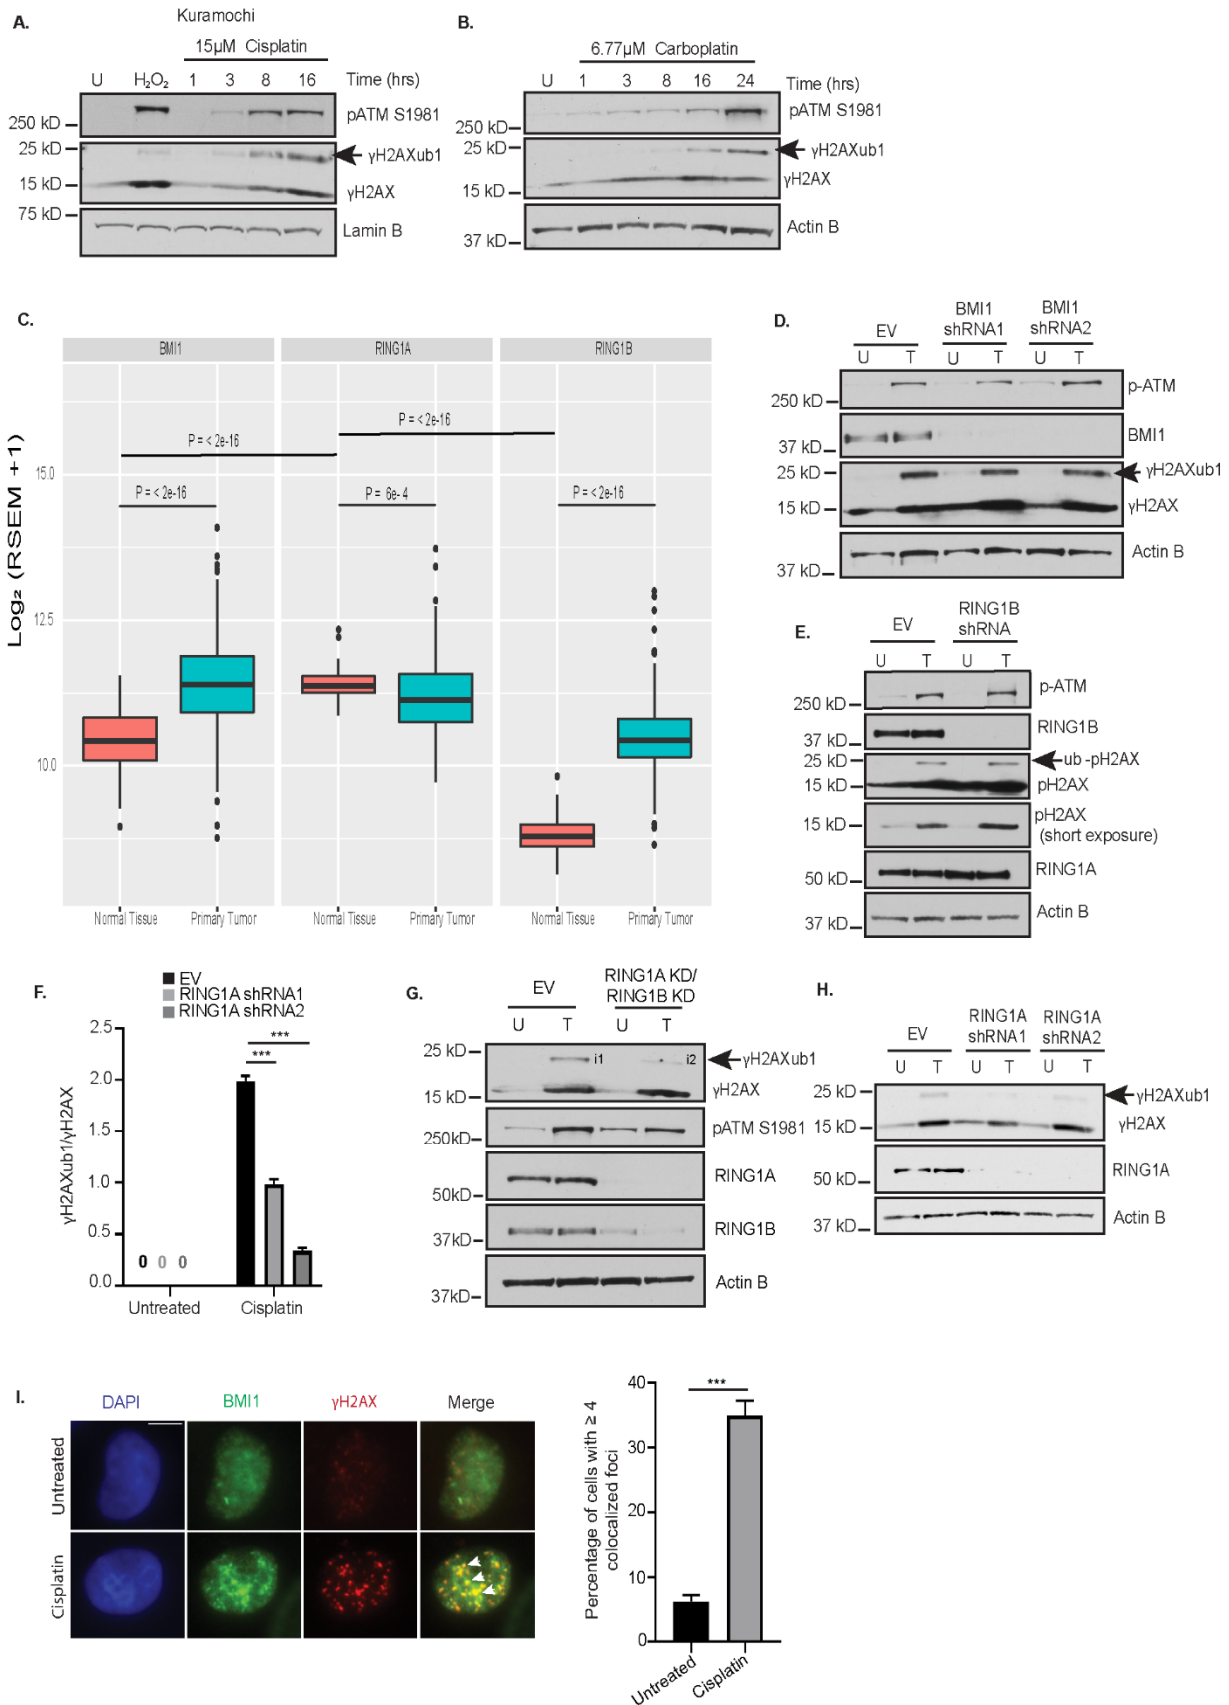

## **Supplementary Figure S1: RING1A mediates monoubiquitination of $\gamma$ H2AX in response to carboplatin**

**(A)** Kuramochi cells were untreated (U), treated with 2 mM H<sub>2</sub>O<sub>2</sub> for 30 minutes or 15  $\mu$ M cisplatin (IC<sub>50</sub> dose) for the indicated time points. Lysates were analyzed by WB (N=3). **(B)** OVCAR5 cells were untreated (U) or treated with 6.77  $\mu$ M carboplatin (IC<sub>50</sub> dose) for the indicated time points. Lysates were analyzed by WB (N=3). **(C)** Box plots of BMI1, RING1A and RING1B expression in normal ovary from GTEx dataset and primary tumor samples from TCGA. OVCAR5 cells were infected with empty vector (EV) or 2 independent BMI1 viral shRNAs **(D)** or RING1B viral shRNA **(E)** and then untreated (U) or treated with 12  $\mu$ M cisplatin (T) for 8 hours. Lysates were analyzed by WB (N=3). **(F)** Graph depicts mean  $\pm$  SEM of densitometric analysis of  $\gamma$ H2AXub1 relative to  $\gamma$ H2AX in EV and RING1A KD cells from Figure 1B (N=3). **(G)** OVCAR5 cells infected with EV viral shRNA or both RING1A and RING1B viral shRNA were untreated (U) or treated with 12  $\mu$ M cisplatin (T) for 8 hours. Intensity 1 (i1) is 2.40 and intensity 2 (i2) is 1.49 relative to respective loading control. **(H)** OVCAR5 cells were infected with EV or 2 independent RING1A viral shRNAs and then untreated (U) or treated with 6.77  $\mu$ M carboplatin (IC<sub>50</sub> dose) for 24 hours. Cell lysates were analyzed by WB. **(I)** Kuramochi cells were treated with 15  $\mu$ M cisplatin for 8 hours and then immunofluorescence analysis was performed for BMI1 (green) and the damage marker  $\gamma$ H2AX (red). Merge image shows overlap of  $\gamma$ H2AX and BMI1. White arrows indicate examples of BMI1 foci that co-localize with  $\gamma$ H2AX. Graph displays mean percentage of cells with  $\geq 4$   $\gamma$ H2AX and BMI1 co-localized foci  $\pm$  SEM (N=3). Scale bar = 5  $\mu$ m.
