# Supplementary material
Source: PubMed Central journal article supplement (PMC7642062)
Supplement: NIHMS1619972-supplement-2.pdf [file NIHMS1619972-supplement-2.pdf]

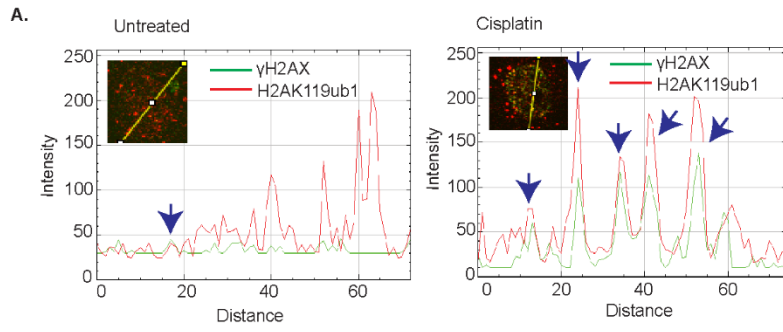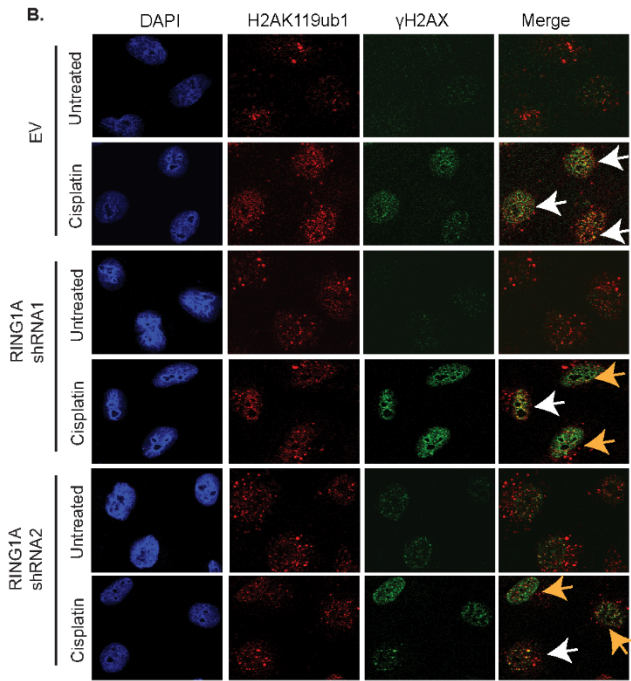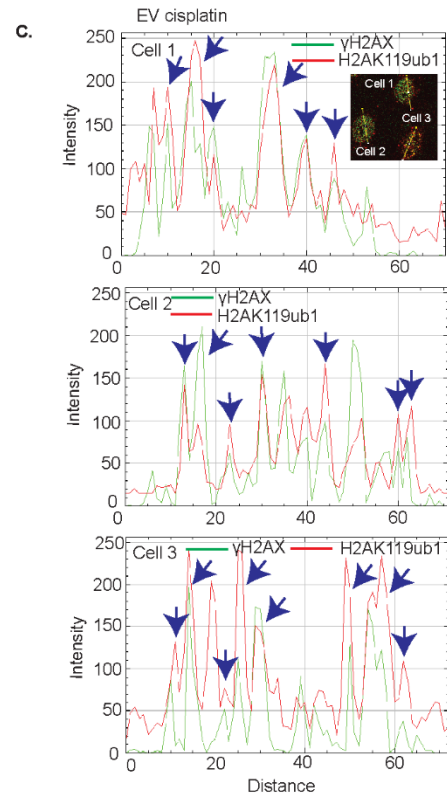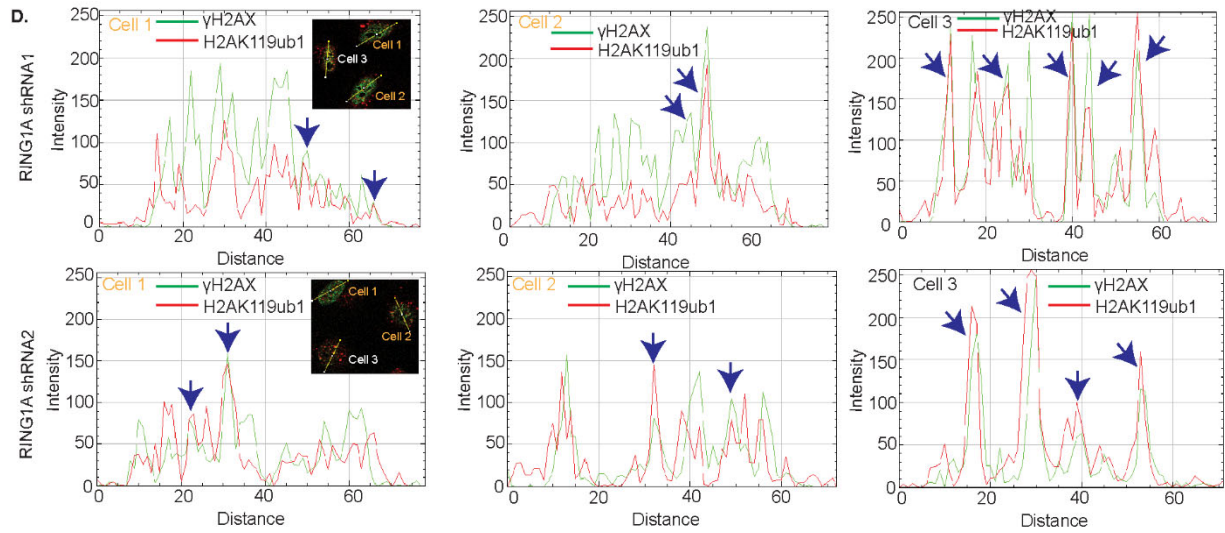

**Supplementary Figure S2: RING1A monoubiquitinates  $\gamma$ H2AX at lysine 119 in response to cisplatin treatment**

**(A)** A representative RGB profile of an untreated and cisplatin treated cell from Figure 1E showing H2AK119ub1 colocalization with  $\gamma$ H2AX. Blue arrows point to foci which colocalize. **(B)** Representative images of untreated and cisplatin treated OVCAR5 EV and RING1A KD cells showing H2AK119ub1 colocalization with  $\gamma$ H2AX. White arrows point to cells showing colocalization (Note the yellow colored foci in EV cisplatin treated cells) and yellow arrows point to cells with reduced colocalization (Note the decrease of yellow foci in RING1A KD cisplatin treated cells). Representative RGB profiles of EV cisplatin treated cells **(C)** and RING1A KD cisplatin treated cells **(D)** showing colocalization of  $\gamma$ H2AX and H2AK119ub1. Blue arrows point to colocalizing foci.
