# Supplementary material
Source: PubMed Central journal article supplement (PMC7642062)
Supplement: NIHMS1619972-supplement-3.pdf [file NIHMS1619972-supplement-3.pdf]

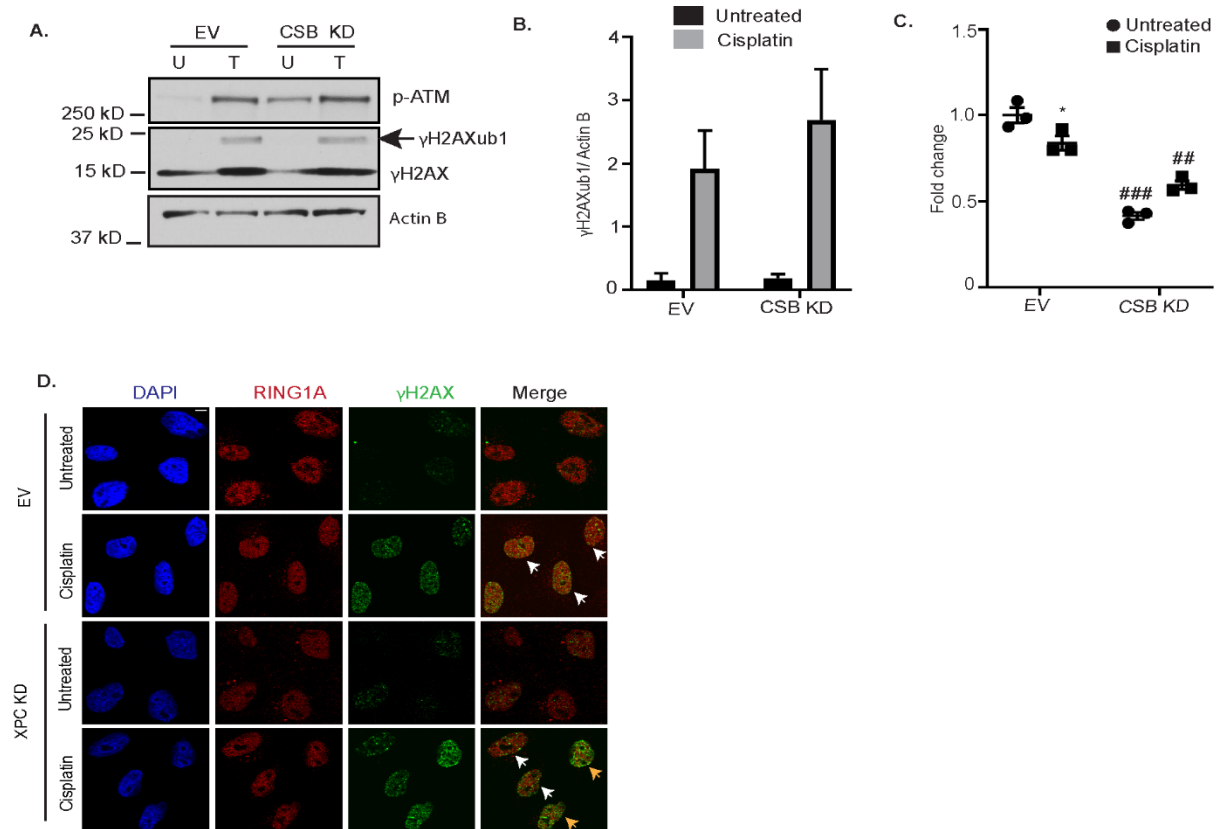

**Supplementary Figure S3: Effects of CSB or XPC knockdown on platinum-induced  $\gamma$ H2AXub1**

**(A)** EV or CSB KD OVCAR5 cells were untreated (U) or treated with 12  $\mu$ M cisplatin (T) for 8 hours. Lysates were analyzed by WB. **(B)** Graph shows mean densitometric analysis  $\gamma$ H2AXub1 normalized to actin B  $\pm$  SEM (N=3). **(C)** Graph shows mean CSB mRNA levels in untreated and cisplatin treated EV and CSB KD cells relative to EV untreated  $\pm$  SEM (N=3). **(D)** Representative images of OVCAR5 EV and XPC KD cells showing RING1A colocalization with  $\gamma$ H2AX. White arrows point to cells with colocalization and yellow arrows point to cells without colocalization (Note the decrease in yellow). Scale bar = 5  $\mu$ M. Statistical significance was calculated using Student's t

test. For untreated versus cisplatin, P-values \* < 0.05, \*\* <0.005, \*\*\* < 0.0005. For EV versus CSB KD, P – values # < 0.05, ## < 0.005, ### < 0.0005.
