# Supplementary material
Source: PubMed Central journal article supplement (PMC7642062)
Supplement: NIHMS1619972-supplement-4.pdf [file NIHMS1619972-supplement-4.pdf]

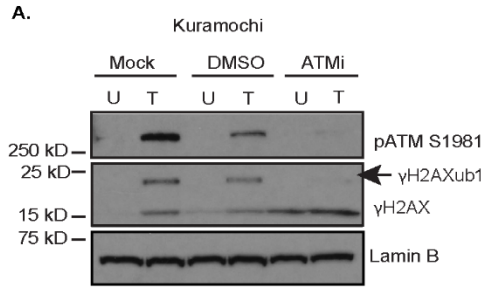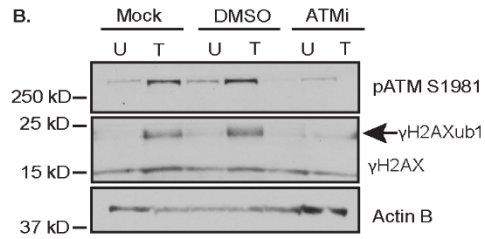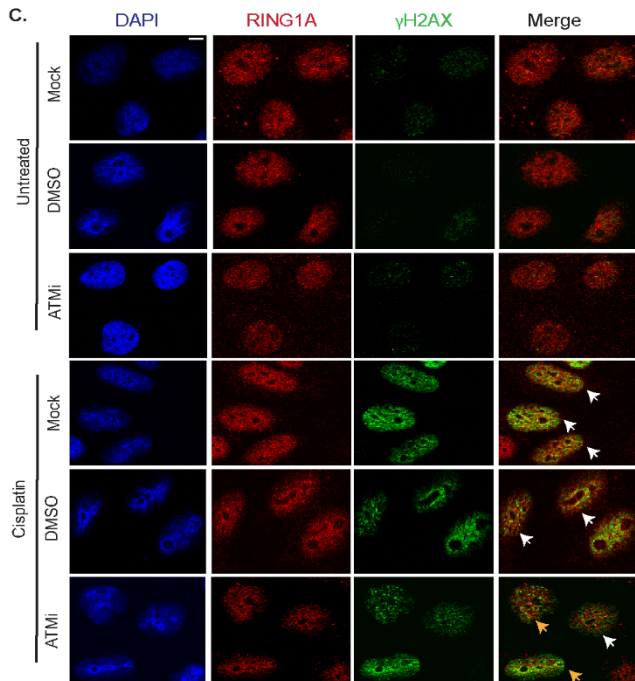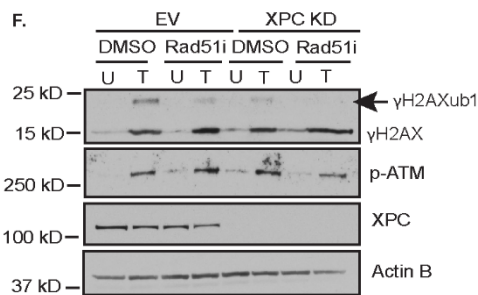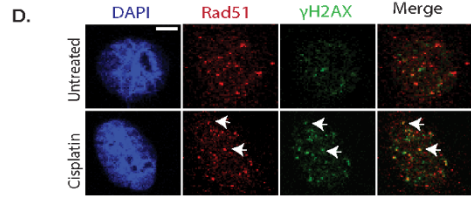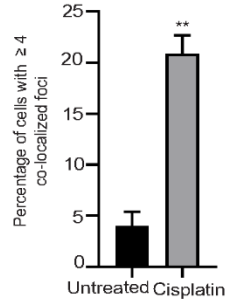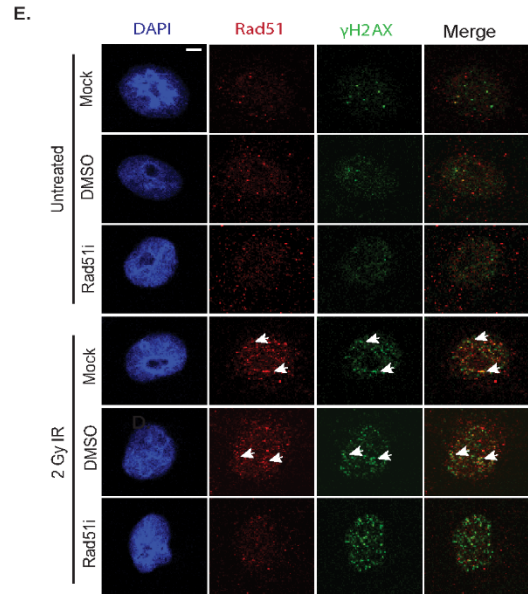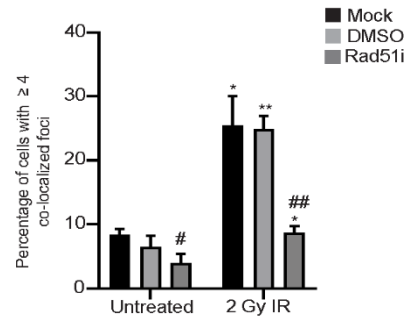

## **Supplementary Figure S4: Rad51 colocalizes with $\gamma$ H2AX in response to cisplatin treatment**

**(A)** Kuramochi cells were not pretreated (mock) or pretreated with DMSO or 15  $\mu$ M ATM inhibitor Ku-55933 for 1 hour and then untreated (U) or treatment with 15  $\mu$ M cisplatin for 8 hours (T) (N=3). **(B)** OVCAR5 cells were pretreated with ATM inhibitor as in (A) and then untreated (U) or treated with 6.77  $\mu$ M carboplatin for 24 hours. Lysates were analyzed by WB (N=2). **(C)** Representative images of OVCAR5 cells showing RING1A colocalization with  $\gamma$ H2AX with and without ATMi followed by cisplatin treatment. White arrows indicate cells showing colocalization and yellow arrows indicate cells with less or no colocalization. **(D)** OVCAR5 cells were either untreated or treated with 12  $\mu$ M cisplatin for 8 hours and then immunofluorescence was performed for  $\gamma$ H2AX (green) and Rad51 (red). White arrows point to examples of  $\gamma$ H2AX and Rad51 foci that co-localize. Graph shows mean percentage of cells with  $\geq 4$  Rad51 and  $\gamma$ H2AX co-localized foci  $\pm$  SEM. Scale bar = 5  $\mu$ m. **(E)** OVCAR5 cells were not pretreated (mock) or pretreated with DMSO or 50  $\mu$ M Rad51 inhibitor B02 for 2 hours and then untreated (U) or treated with 2 Gy IR. After IR exposure, cells were allowed to recover for 15 minutes at 37°C. Graph shows mean percentage of cells with  $\geq 4$   $\gamma$ H2AX and Rad51 co-localized foci  $\pm$  SEM (N=3). White arrows show examples of  $\gamma$ H2AX and Rad51 foci that co-localize. Scale bar = 5  $\mu$ m. **(F)** EV or XPC KD OVCAR5 cells were either pretreated with DMSO or 50  $\mu$ M Rad51 inhibitor (B02) for 2 hours and then (U) or treated (T) with cisplatin for 8 hours. Lysates were analyzed by WB (N=2). Statistical significance was

calculated using Student's t test. For untreated versus cisplatin or 2 Gy IR treated, P-values \* < 0.05, \*\* <0.005, \*\*\* < 0.0005. For Mock or DMSO versus Rad51i P – values # < 0.05, ## < 0.005, ### < 0.0005.
